# Supplementary material
Source: publisher figshare collection journal article supplement (https://acs.figshare.com/ndownloader/files/3991894)
Supplement: Supplementary file 1 [file 3991894]

Supporting Information for

# **Photoinduced formation of bi-thiophene Radical cation via a hole-transfer process from CdS nanocrystals**

Alessandro Iagatti<sup>a</sup>, Rebecca Flamini, Morena Nocchetti and Loredana Latterini\*

Dipartimento di Chimica and Centro Eccellenza Materiali Innovativi Nanostrutturati (CEMIN),  
Università di Perugia, Via Elce di Sotto 8, 06123 Perugia, Italy

<sup>a</sup>Present address: European Laboratory for Non Linear Spectroscopy (LENS), Università di Firenze, via  
Nello Carrara 1, 50019 Sesto Fiorentino, Florence, Italy and INO - CNR, Istituto Nazionale di Ottica –  
Consiglio Nazionale delle Ricerche, Largo Fermi 6, 50125 Florence, Italy

\*E-mail: [loredana.latterini@unipg.it](mailto:loredana.latterini@unipg.it)

**1. Estimation of quenching rate constant**

**2. TEM Image**

**3. XRD pattern and Instrumental set-up description**

**4. Luminescence decay curves and phase-shift data together with the Instrumental set-up description**

## 1. Estimation of quenching rate constant

Smoluchowski equation:  $k_q = [(4\pi N/1000)(R_f + R_q)(D_f + D_q)]$ , where  $R_f$  and  $R_q$  are the radii of the CdS colloids (1.6 nm, it was taken the average value from DLS data) and bi-thiophene molecules (ca. 0.3 nm, determined on the basis of atom distances from reference 24 of the manuscript and approximating the molecules to a spherical shape);  $D_f$  and  $D_q$  are their diffusion coefficients determined by the Stokes-Einstein equation assuming the same radii. These equations were used considering the CdS nanocrystals as a fluorophore and the bi-thiophene (whose dimensions under the working conditions are known in the literature) as the quencher.

## 2. TEM Image

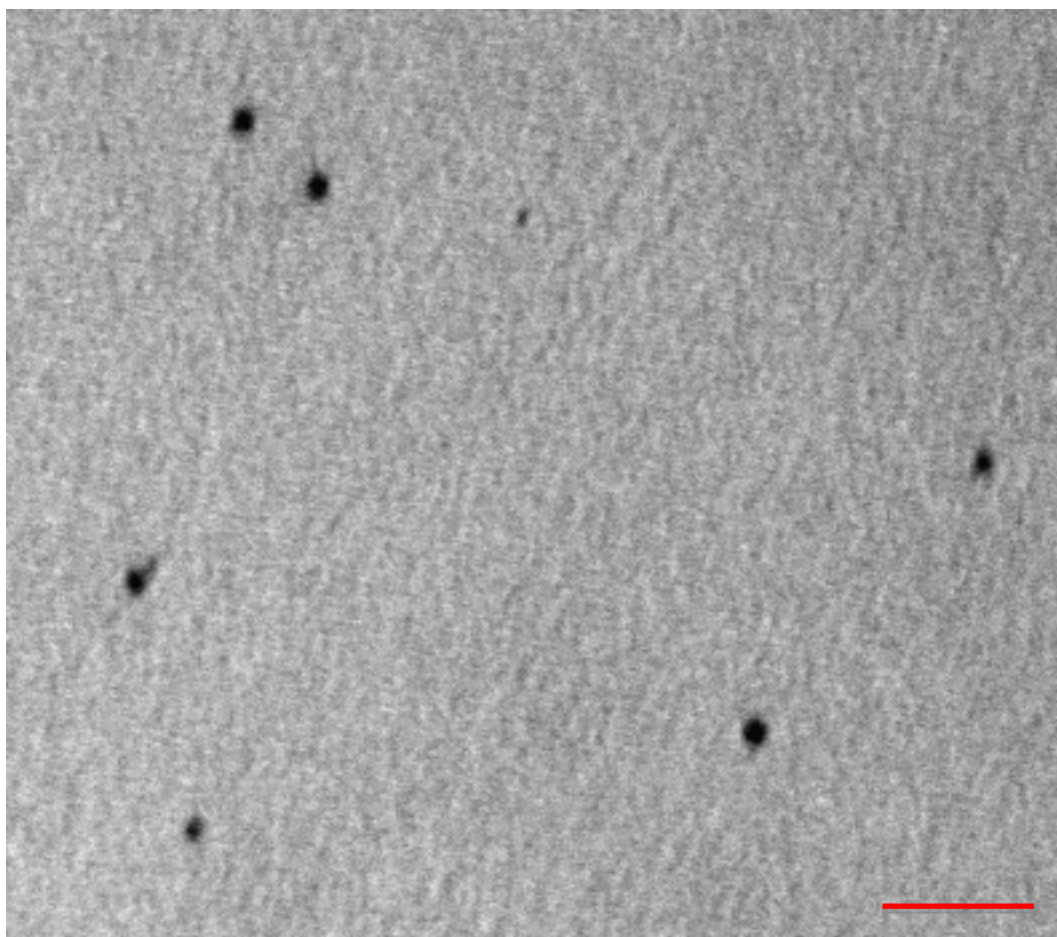

**Figure S1.** TEM images of CdS nanocrystals (scale bar is 20 nm).

### 3. XRD pattern and Instrumental set-up description

The X-ray powder diffraction (XRPD) patterns were taken with a Philips X'PERT PRO MPD diffractometer operating at 40 kV and 40 mA, step size 0.0170  $2\theta$  degree and step scan 20 s, using the  $\text{CuK}\alpha$  radiation and an X'Celerator detector.<sup>3</sup>

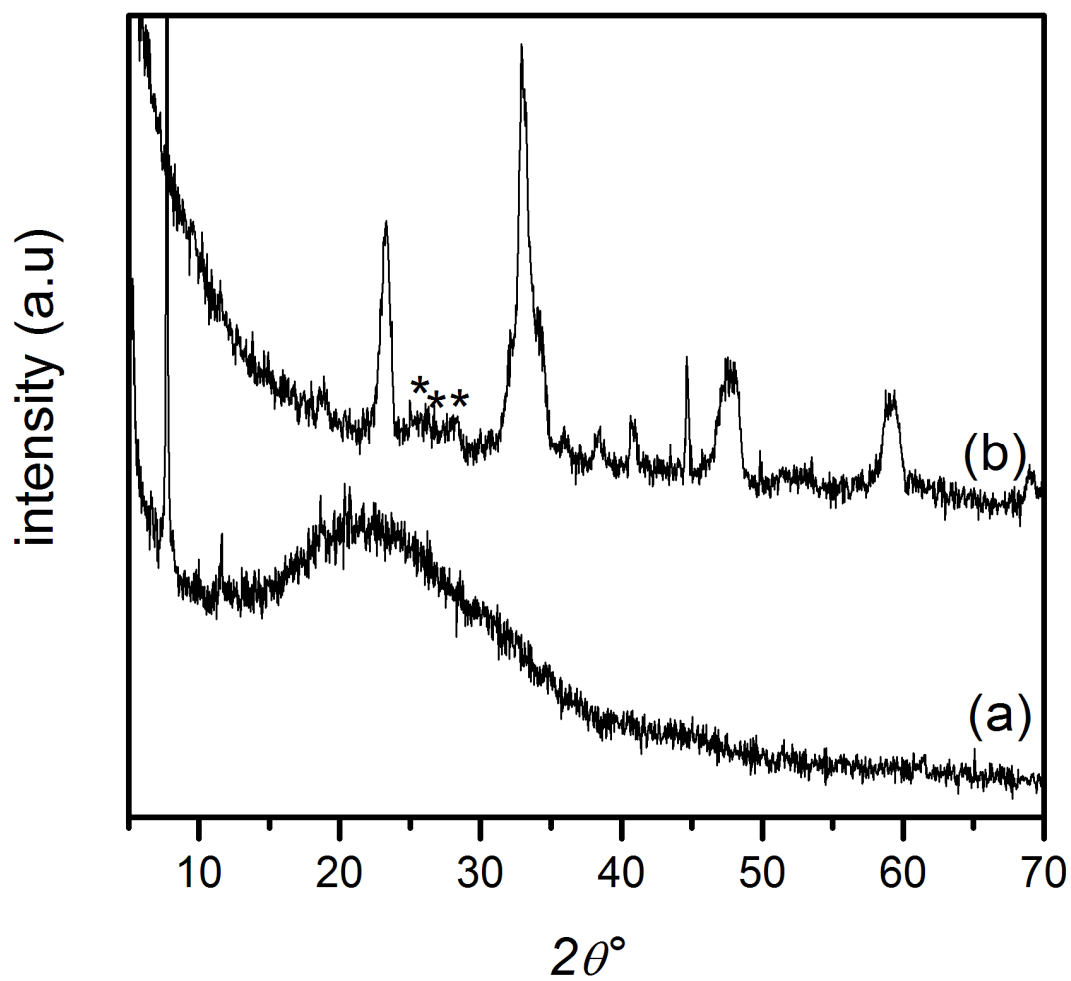

**Figure S2.** XRD of as prepared CdS nanoparticles (a) and CdS nanoparticles calcinated at 350° C (b).

#### 4. Luminescence decay curves and phase-shift data together with the Instrumental set-up description

The fluorescence lifetimes,  $\tau_F$ , were measured by a Spex Fluorolog- $\tau$ 2 system, which uses the phase-modulation technique (excitation wavelength modulated in the 0.5-330 MHz range; time resolution ca.10 ps). The frequency-domain intensity decays (phase angle and modulation Vs. frequency) were analyzed with the Globals Unlimited (rev. 3) global analysis software.<sup>1,2</sup>

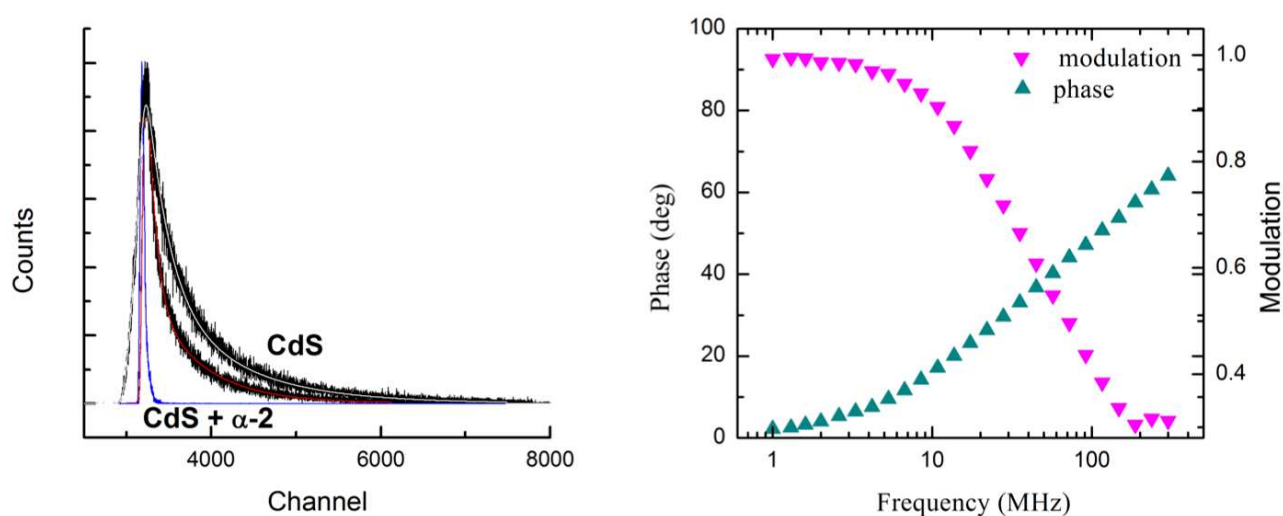

**Figure S3.** Luminescence decay curves (left panel) CdS nanoparticles recorded ( $\lambda_{\text{exc}} = 370$  nm) in the presence and in the absence of bi-thiophene molecules; phase-shift curves of CdS luminescence (right panel) recorded ( $\lambda_{\text{exc}} = 370$  nm) in the presence of bi-thiophene molecules ( $6.5 \times 10^{-4}$  M).

## References

1. Beechem, J. M.; Gratton, E.; Ameloot, M.; Kutson, J. R.; Brand, L. Fluorescence Spectroscopy: Vol. 1 Principles and Techniques; Lakowicz, J. R., Ed.; Plenum Press: New York, **1988**; and references therein.
2. Aloisi, G. G.; Elisei, F.; Latterini, L.; Mazzucato, U.; Rodgers, M. A. J. Excited State Behavior of Diarylethenes in the Subnanosecond Timescale: The Role of an Upper Singlet, *J. Am. Chem. Soc.* **1996**, *118*, 10879-10887.
3. Nocchetti, M.; Donnadio, A.; Ambrogio, V.; Andreani, P.; Bastianini, M.; Pietrella, D.; Latterini, L. Ag/AgCl nanoparticle decorated layered double hydroxides: synthesis, characterization and antimicrobial properties, *Mater. Chem. B*, **2013**, *1*, 2383-2393
